# Supplementary material for: Emergence of the Mitochondrial Reticulum from Fission and Fusion Dynamics
Source: PLOS journal article supplement (doi:10.1371/journal.pcbi.1002745), 2012-10-25
Supplement: S1 (10.1371/journal.pcbi.1002745.s001) [file journal.pcbi.1002745.s001]

## Supporting Information Table S1

Results of segmentation analysis of confocal micrographs

(For details of image acquisition and analysis see the main text: Materials and Methods and the first Section of Results).

| Confocal micrographs | Number of branching nodes of degree $k^*$ |         |         |         | Number of segments <sup>**</sup> |       | Number of clusters <sup>***</sup> |
|----------------------|-------------------------------------------|---------|---------|---------|----------------------------------|-------|-----------------------------------|
|                      | $k = 3$                                   | $k = 4$ | $k = 5$ | $k = 6$ | in the largest cluster           | total |                                   |
| Image 1              | 718                                       | 180     | 23      | 4       | 351                              | 580   | 65                                |
| Image 2              | 1245                                      | 256     | 28      | 2       | 255                              | 1142  | 252                               |
| Image 3              | 834                                       | 163     | 5       | 1       | 202                              | 746   | 155                               |
| Image 4              | 488                                       | 91      | 5       | 2       | 28                               | 591   | 238                               |
| Image 5              | 258                                       | 42      | 1       | 0       | 70                               | 242   | 54                                |
| Image 6              | 3622                                      | 737     | 26      | 3       | 1893                             | 2698  | 252                               |
| Image 7              | 493                                       | 100     | 5       | 3       | 146                              | 602   | 253                               |

\* Degree of a node is defined as number of edges connecting this node to the rest of the network.

\*\* A mitochondrial *segment* is defined as one or more network edges connected only through bulk sites (nodes of degree 2).

\*\*\* A *cluster* is defined as a detached set of interconnected segments. The network of cellular mitochondria consists of a set of clusters.
